# Supplementary material
Source: PubMed Central journal article supplement (PMC9158509)
Supplement: NIHMS1765705-supplement-Supplemental_Publication_Material.pdf [file NIHMS1765705-supplement-Supplemental_Publication_Material.pdf]

## **SUPPLEMENTAL MATERIAL**

### **Supplemental Methods**

*SOMAScan™ Proteomic profiling.* JHS plasma samples were collected at Visit 1 in EDTA tubes, then maintained in -70°C freezers.<sup>71</sup> Proteomic measurements were performed using SOMAScan™, a single-stranded DNA aptamer-based proteomics platform, which contained 1,301 aptamers.<sup>72</sup> Samples were run in three separate batches.

In MESA, samples were run in one batch. EDTA tubes were collected, stored on ice for no more than 30 minutes, and centrifuged for 15 minutes at 2000g, then stored in -70°C without freeze thaw cycles until assayed.

In HERITAGE, plasma samples were collected in EDTA tubes and stored at -80°C then were diluted in three different concentrations (40%, 1% and 0.05%) and profiled using the expanded SOMAScan™ platform (~5,000 SOMAmers™). Compared to MESA and JHS, some aptamers for a given protein were changed on this expanded platform, and those differences are indicated where appropriate. Plasma samples had either 0 or 1 freeze-thaw cycle prior to proteomics profiling.

All assays in all cohorts were performed using SOMAScan™ reagents according to the manufacturer's detailed protocol.<sup>72</sup> In brief, a SOMAmer reagent is a single-stranded DNA-based aptamer that is chemically modified to enhance binding to conformational protein epitopes. In addition, SOMAmers are flourophore- tagged to allow detection by standard oligo-array readers. The assay measures proteins directly from plasma using a multi-step capture, release, and re-capture enrichment process. Plasma proteins first bind to the bead-immobilized SOMAmers. SOMAmer -bound proteins are then biotinylated. SOMAmer -protein complexes

are next released by a photocleavage process. Biotinylated proteins are then bound to second set of streptavidin beads. Following a washing step, SOMAmers are released from the protein targets and collected. The fluorophore-tagged modified -nucleotides are quantitated using an oligo-array plate reader providing relative fluorescent unit (RFU) readout, which is proportional to protein concentration in the sample. The assay was performed on 96-well -plates with 85 wells on each plate dedicated to study samples and 11 wells used for quality controls (QC). QC samples include five “calibrator” plasma samples from a single “pool” that are used to assess intra-assay CVs and standardize across experiments; three samples from a distinct “QC” plasma pool are used to assess inter-assay CVs across plates. Sample data was normalized to remove hybridization variation within an oligo-array reader set followed by median normalization across all samples to remove other assay biases within the run and finally calibrated to remove assay differences between runs. Non-human proteins were excluded from analysis. Samples are log-transformed and scaled to mean 0 and standard deviation of 1. This is done *within* batch if batch effects are present, which was the case in JHS but not MESA or HERITAGE.

*Olink® proteomic profiling.* A subset of 488 individuals from JHS also had proteomic profiling in a single batch using the Olink® Explore 1536 panel (Olink Proteomics AB, Uppsala, Sweden) according to the manufacturer's instructions. The Proximity Extension Assay technology used for the Olink protocol has been well described,<sup>37</sup> and Olink Explore enables 1536 analytes to be analyzed simultaneously, using 2.8 µL of each sample. In brief, pairs of oligonucleotide-labeled antibody probes bind to their targeted protein, and if the two probes are brought in close proximity the oligonucleotides will hybridize in a pair-wise manner. The addition of a DNA polymerase leads to a proximity-dependent DNA polymerization event, generating a unique

double stranded DNA barcode for each specific antigen. The resulting DNA sequence is subsequently detected and quantified using NGS (Illumina® NovaSeq). Data is then quality controlled and normalized using an internal extension control and a plate control, to adjust for intra- and inter-run variation. The final assay read-out is presented in Normalized Protein eXpression (NPX) values, which is an arbitrary unit on a log<sub>2</sub>-scale where a high value corresponds to a higher protein expression. All assay validation data (detection limits, intra- and inter-assay precision data, etc) are available on manufacturer's website ([www.olinkeXplore.com](http://www.olinkeXplore.com)).

*JHS phenotypes and statistical analysis.* Baseline characteristics were assessed at Visit 1 between 2000 and 2004. Diabetes was defined as 1) fasting glucose  $\geq 126$  mg/dL, 2) hemoglobin A1c (HbA1c)  $\geq 6.5\%$ , or 3) use of diabetic medication (confirmed by medication inventory or self-reported) within 2 weeks prior to the clinic visit. Resting blood pressure was measured while sitting by recording two measurements with a Hawksley random zero sphygmomanometer using one of four cuff sizes selected by measured arm circumference. Hypertension was defined as use of blood pressure lowering medication or blood pressure  $>140/90$  mmHg. Hypertensive treatment was determined by patient medication inventory or self-report of taking blood pressure medication. Routine laboratory measurements were made at the time of first exam using standard venipuncture and laboratory techniques.<sup>71</sup> Glomerular filtration rate (eGFR) was estimated using the CKD-EPI equation.<sup>73</sup> Echocardiography was performed at the baseline visit in JHS by a trained sonographer using standard protocols (Sonos-4500; Philips Medical Systems).<sup>74</sup> Left ventricular (LV) mass was estimated in grams as previously described using the formula  $0.8 \times (1.04 \times [([interventricular\ septal\ thickness\ in\ the\ end\ diastole + LV\ end\ diastolic\ dimension + posterior\ wall\ thickness\ in\ the\ end\ diastole]^3 - LV\ end\ diastolic\ dimension)^3]) + 0.6$ .<sup>75</sup>

Associations between clinical parameters and protein levels were assessed using linear regression models adjusted for age, sex, proteomic batch/plate, hypertension, systolic blood pressure, diabetes, HbA1c, and body mass index. Left ventricular mass was natural log transformed to improve normality.

**Supplemental Figures:**

Figure S1.

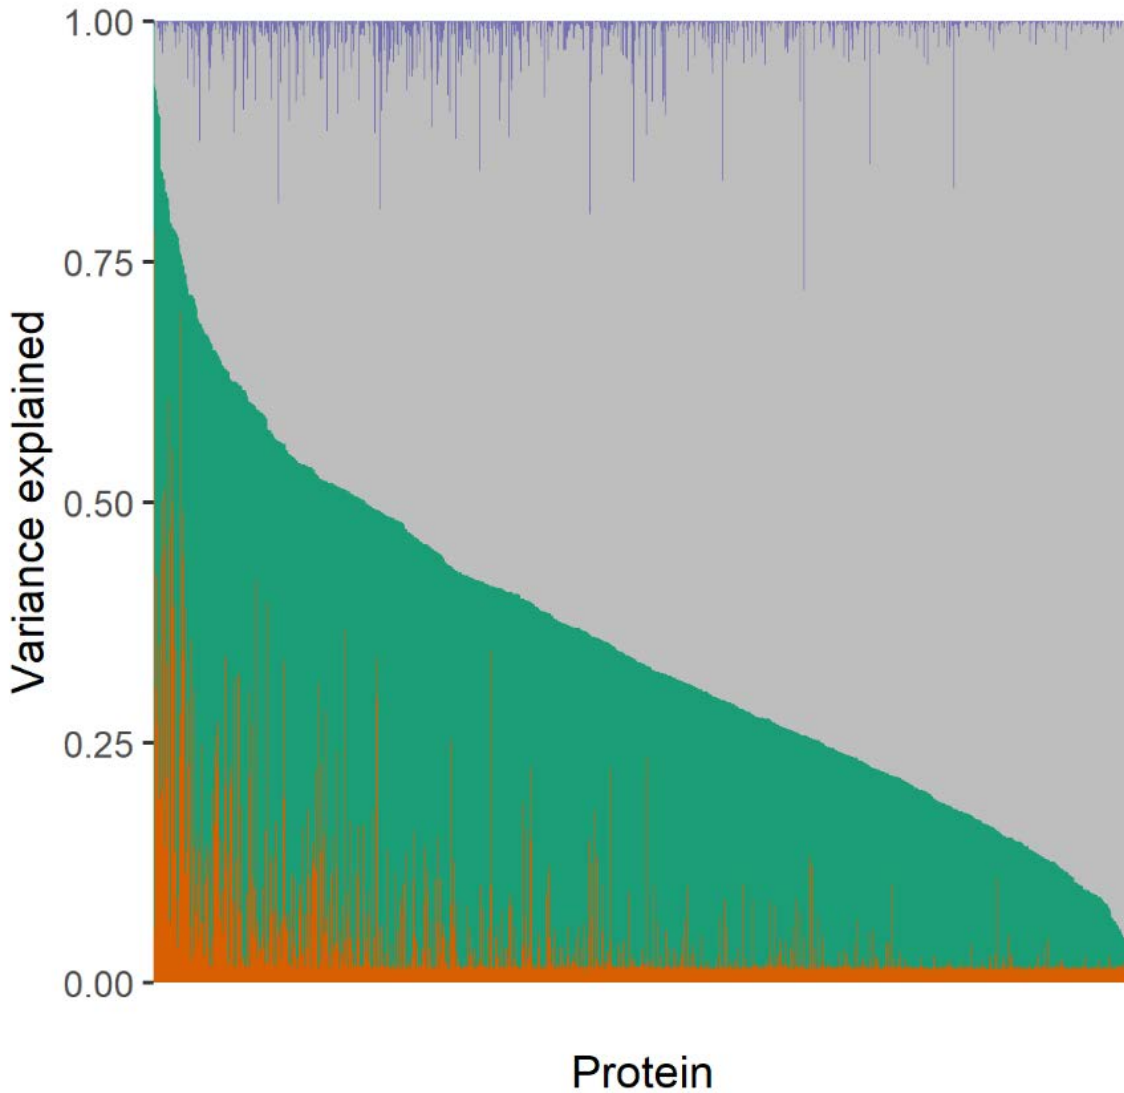

Variance explained across proteins whose total heritability could be estimated (N=1120). Orange represents variance explained by top SNP, while green+orange represents total heritability. Purple is variance explained by clinical covariates: age, sex, systolic blood pressure, diabetes, use of hypertensive medication, current smoking status, and a history of coronary heart disease. Grey represents unexplained variance.

Figure S2.

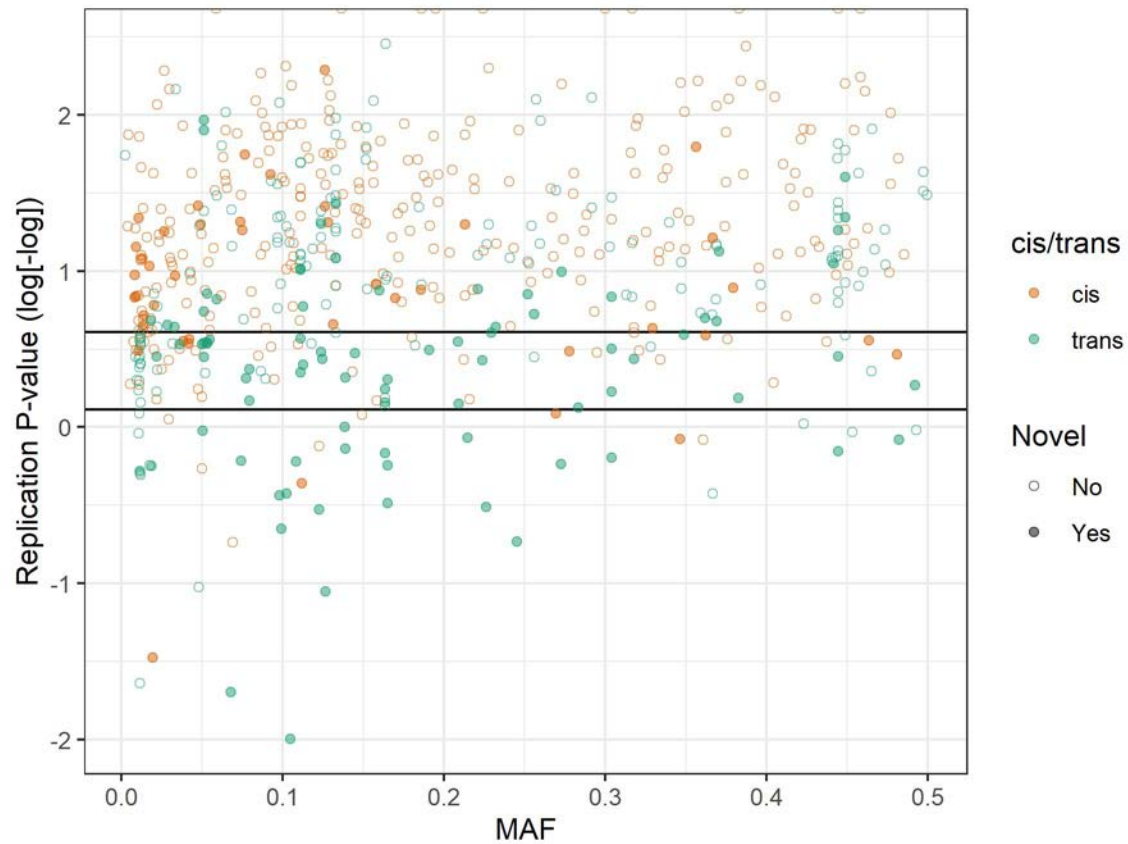

Minor allele frequency in Jackson Heart Study vs p-value of meta-analysis in MESA/HERITAGE for 569 sentinel SNPs. Shaded circles indicate sentinel SNPs for novel loci. The p-values on the y-axis have been transformed ( $\log(-\log(p))$ ) for clearer viewing. The lower horizontal line corresponds to  $p=0.05$ , while the higher line corresponds to  $p = 0.05/569 = 8.8 \times 10^{-5}$

Figure S3.

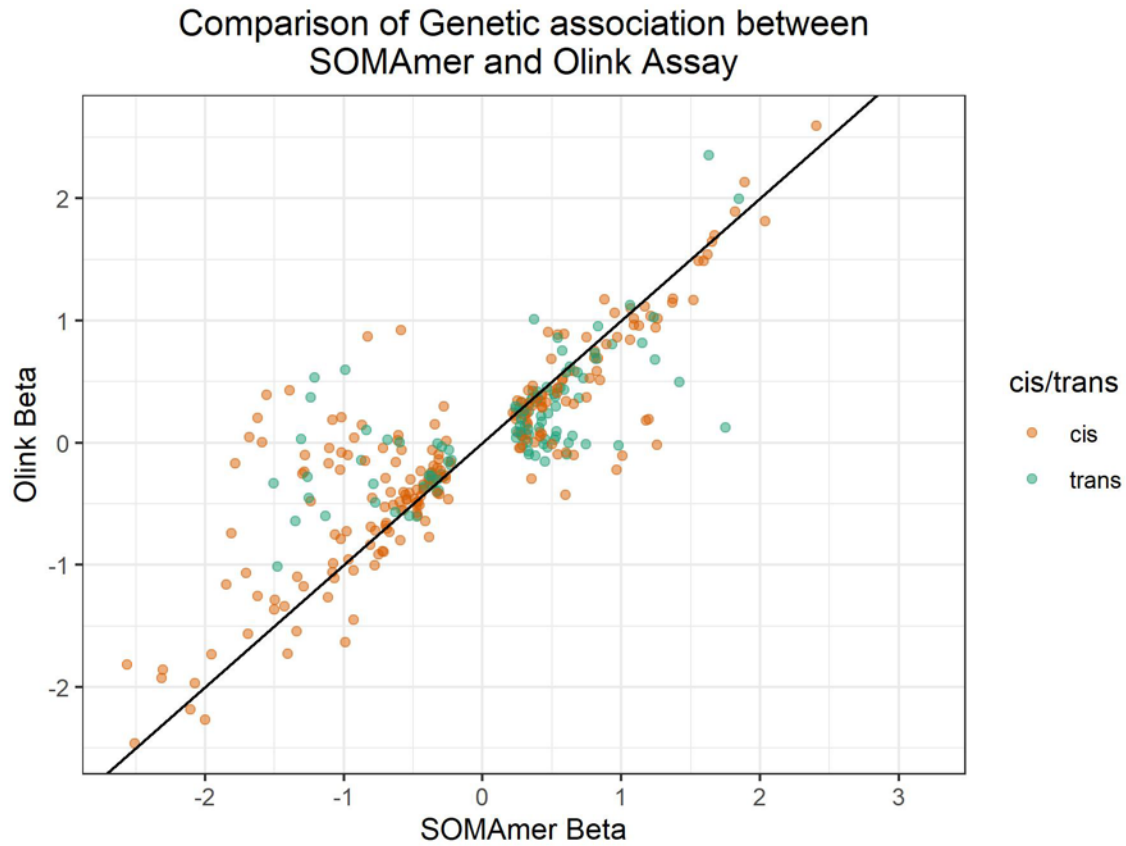

Association between protein levels and sentinel variant for any proteins represented on both SOMA and Olink platforms. The line represents the identity.

Figure S4.

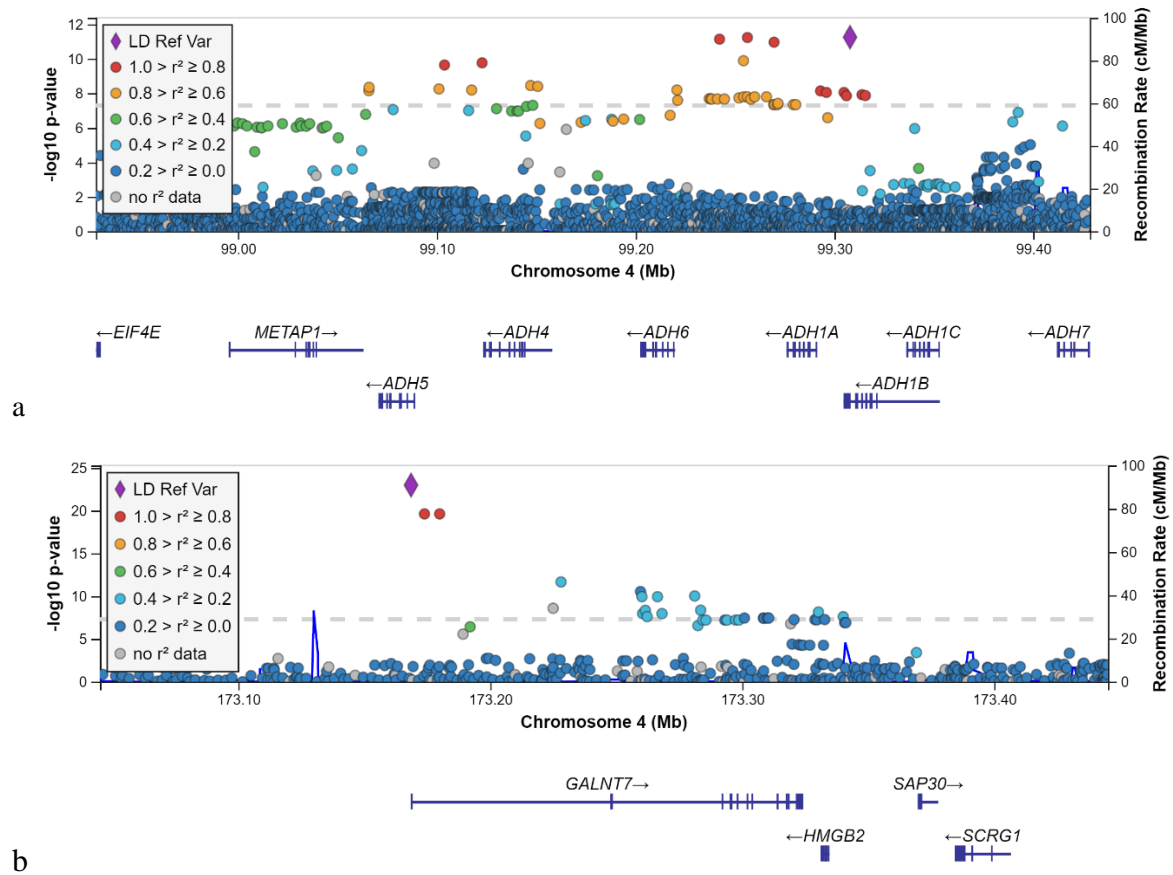

Locus zoom plots for two novel pQTLs: *ADH1B* (sentinel SNP rs2066702) and *NAMPT* (a) and *GALNT7* (sentinel SNP rs576753655/rs545617673) and plasminogen/angiotatin (b).



## Supplemental Excel Files

|          |                                                                                  |
|----------|----------------------------------------------------------------------------------|
| Table S1 | Summary demographics for the three cohorts included in the manuscript            |
| Table S2 | Total heritability for each protein                                              |
| Table S3 | Main list of pQTLs (Afr = African, NF Eur = Non-Finnish European)                |
| Table S4 | Additional cis-pQTLs to a p value of $< 5e-6$                                    |
| Table S4 | List of pQTLs by Meta-analysis between JHS, MESA, and HERITAGE                   |
| Table S6 | All pQTL variants which overlap with ClinVar variants                            |
| Table S7 | All pQTL variants which overlap with GWAS findings as indexed in Phenoscanner V2 |

## TOPMed Collaborators

| Name                 | Institution(s)                                 | Primary Department | Institution City | Institution State | Zip Code | Country |
|----------------------|------------------------------------------------|--------------------|------------------|-------------------|----------|---------|
| Abe, Namiko          | New York<br>Genome<br>Center                   |                    | New York         | New York          | 10013    | US      |
| Abecasis,<br>Gonçalo | University of<br>Michigan                      |                    | Ann Arbor        | Michigan          | 48109    | US      |
| Aguet, Francois      | Broad<br>Institute                             |                    | Cambridge        | Massachusetts     | 02142    | US      |
| Albert, Christine    | Cedars Sinai<br><br>Children's<br>Hospital of  |                    | Boston           | Massachusetts     | 02114    | US      |
| Almasy, Laura        | Philadelphia,<br>University of<br>Pennsylvania |                    | Philadelphia     | Pennsylvania      | 19104    | US      |
| Alonso, Alvaro       | Emory<br>University                            |                    | Atlanta          | Georgia           | 30322    | US      |
| Ament, Seth          | University of<br>Maryland                      |                    | Baltimore        | Maryland          | 21201    | US      |

| <b>Name</b>                      | <b>Institution(s)</b>               | <b>Primary<br/>Department</b> | <b>Institution City</b> | <b>Institution<br/>State</b> | <b>Zip<br/>Code</b> | <b>Country</b> |
|----------------------------------|-------------------------------------|-------------------------------|-------------------------|------------------------------|---------------------|----------------|
| Anderson, Peter                  | University of<br>Washington         |                               | Seattle                 | Washington                   | 98195               | US             |
| Anugu, Pramod                    | University of<br>Mississippi        |                               | Jackson                 | Mississippi                  | 38677               | US             |
| Applebaum-<br>Bowden,<br>Deborah | National<br>Institutes of<br>Health |                               | Bethesda                | Maryland                     | 20892               | US             |
| Ardlie, Kristin                  | Broad<br>Institute                  |                               | Cambridge               | Massachusetts                | 02142               | US             |
| Arking, Dan                      | Johns<br>Hopkins<br>University      |                               | Baltimore               | Maryland                     | 21218               | US             |
| Arnett, Donna K                  | University of<br>Kentucky           |                               | Lexington               | Kentucky                     | 40506               | US             |
| Ashley-Koch,<br>Allison          | Duke<br>University                  |                               | Durham                  | North Carolina               | 27708               | US             |
| Aslibekyan,<br>Stella            | University of<br>Alabama            |                               | Birmingham              | Alabama                      | 35487               | US             |

| <b>Name</b>                  | <b>Institution(s)</b>                                                       | <b>Primary<br/>Department</b> | <b>Institution City</b> | <b>Institution<br/>State</b> | <b>Zip<br/>Code</b> | <b>Country</b> |
|------------------------------|-----------------------------------------------------------------------------|-------------------------------|-------------------------|------------------------------|---------------------|----------------|
| Assimes, Tim                 | Stanford<br>University                                                      |                               | Stanford                | California                   | 94305               | US             |
| Auer, Paul                   | Medical<br>College of<br>Wisconsin                                          |                               | Milwaukee               | Wisconsin                    | 53211               | US             |
| Avramopoulos,<br>Dimitrios   | Johns<br>Hopkins<br>University                                              |                               | Baltimore               | Maryland                     | 21218               | US             |
| Ayas, Najib                  | Providence<br>Health Care                                                   | Medicine                      | Vancouver               |                              |                     | CA             |
| Balasubramanian<br>, Adithya | Baylor<br>College of<br>Medicine<br>Human<br>Genome<br>Sequencing<br>Center |                               | Houston                 | Texas                        | 77030               | US             |
| Barnard, John                | Cleveland<br>Clinic                                                         |                               | Cleveland               | Ohio                         | 44195               | US             |

| <b>Name</b>              | <b>Institution(s)</b>                                                 | <b>Primary<br/>Department</b>   | <b>Institution City</b> | <b>Institution<br/>State</b> | <b>Zip<br/>Code</b> | <b>Country</b> |
|--------------------------|-----------------------------------------------------------------------|---------------------------------|-------------------------|------------------------------|---------------------|----------------|
| Barnes, Kathleen         | Tempus,<br>University of<br>Colorado<br>Anschutz<br>Medical<br>Campus |                                 | Aurora                  | Colorado                     | 80045               | US             |
| Barr, R. Graham          | Columbia<br>University                                                |                                 | New York                | New York                     | 10032               | US             |
| Barron-Casella,<br>Emily | Johns<br>Hopkins<br>University                                        |                                 | Baltimore               | Maryland                     | 21218               | US             |
| Barwick, Lucas           | The Emmes<br>Corporation                                              | LTRC                            | Rockville               | Maryland                     | 20850               | US             |
| Beaty, Terri             | Johns<br>Hopkins<br>University                                        |                                 | Baltimore               | Maryland                     | 21218               | US             |
| Beck, Gerald             | Cleveland<br>Clinic                                                   | Quantitative Health<br>Sciences | Cleveland               | Ohio                         | 44195               | US             |

| <b>Name</b>        | <b>Institution(s)</b>                                                    | <b>Primary Department</b>            | <b>Institution City</b> | <b>Institution State</b> | <b>Zip Code</b> | <b>Country</b> |
|--------------------|--------------------------------------------------------------------------|--------------------------------------|-------------------------|--------------------------|-----------------|----------------|
| Becker, Diane      | Johns Hopkins University                                                 | Medicine                             | Baltimore               | Maryland                 | 21218           | US             |
| Becker, Lewis      | Johns Hopkins University                                                 |                                      | Baltimore               | Maryland                 | 21218           | US             |
| Beer, Rebecca      | National Heart, Lung, and Blood Institute, National Institutes of Health |                                      | Bethesda                | Maryland                 | 20892           | US             |
| Beitelshees, Amber | University of Maryland                                                   |                                      | Baltimore               | Maryland                 | 21201           | US             |
| Benjamin, Emelia   | Boston University, Massachusetts General Hospital                        | Boston University School of Medicine | Boston                  | Massachusetts            | 02114           | US             |

| <b>Name</b>       | <b>Institution(s)</b>                                        | <b>Primary Department</b>                    | <b>Institution City</b> | <b>Institution State</b> | <b>Zip Code</b> | <b>Country</b> |
|-------------------|--------------------------------------------------------------|----------------------------------------------|-------------------------|--------------------------|-----------------|----------------|
| Benos, Takis      | University of Pittsburgh                                     |                                              | Pittsburgh              | Pennsylvania             | 15260           | US             |
| Bezerra, Marcos   | Fundação de Hematologia e Hemoterapia de Pernambuco - Hemope |                                              | Recife                  |                          | 52011-000       | BR             |
| Bielak, Larry     | University of Michigan                                       | Cardiovascular                               | Ann Arbor               | Michigan                 | 48109           | US             |
| Bis, Joshua       | University of Washington                                     | Health Research Unit, Department of Medicine | Seattle                 | Washington               | 98195           | US             |
| Blackwell, Thomas | University of Michigan                                       |                                              | Ann Arbor               | Michigan                 | 48109           | US             |
| Blangero, John    | University of Texas Rio Grande                               | Human Genetics                               | Brownsville             | Texas                    | 78520           | US             |

| <b>Name</b>          | <b>Institution(s)</b>         | <b>Primary<br/>Department</b> | <b>Institution City</b> | <b>Institution<br/>State</b> | <b>Zip<br/>Code</b> | <b>Country</b> |
|----------------------|-------------------------------|-------------------------------|-------------------------|------------------------------|---------------------|----------------|
|                      | Valley School<br>of Medicine  |                               |                         |                              |                     |                |
|                      | University of                 |                               |                         |                              |                     |                |
| Boerwinkle, Eric     | Texas Health<br>at Houston    |                               | Houston                 | Texas                        | 77225               | US             |
| Bowden, Donald<br>W. | Wake Forest<br>Baptist Health | Department of<br>Biochemistry | Winston-Salem           | North Carolina               | 27157               | US             |
| Bowler, Russell      | National<br>Jewish Health     | National Jewish<br>Health     | Denver                  | Colorado                     | 80206               | US             |
| Brody, Jennifer      | University of<br>Washington   |                               | Seattle                 | Washington                   | 98195               | US             |
|                      | Medical                       |                               |                         |                              |                     |                |
| Broeckel, Ulrich     | College of<br>Wisconsin       |                               | Milwaukee               | Wisconsin                    | 53226               | US             |
| Broome, Jai          | University of<br>Washington   |                               | Seattle                 | Washington                   | 98195               | US             |



| <b>Name</b>        | <b>Institution(s)</b>                   | <b>Primary Department</b>    | <b>Institution City</b> | <b>Institution State</b> | <b>Zip Code</b> | <b>Country</b> |
|--------------------|-----------------------------------------|------------------------------|-------------------------|--------------------------|-----------------|----------------|
| Brown, Deborah     | University of Texas Health at Houston   | Pediatrics                   | Houston                 | Texas                    | 77030           | US             |
| Bunting, Karen     | New York Genome Center                  |                              | New York                | New York                 | 10013           | US             |
| Burchard, Esteban  | University of California, San Francisco |                              | San Francisco           | California               | 94143           | US             |
| Bustamante, Carlos | Stanford University                     | Biomedical Data Science      | Stanford                | California               | 94305           | US             |
| Buth, Erin         | University of Washington                | Biostatistics                | Seattle                 | Washington               | 98195           | US             |
| Cade, Brian        | Brigham & Women's Hospital              | Brigham and Women's Hospital | Boston                  | Massachusetts            | 02115           | US             |
| Cardwell, Jonathan | University of Colorado at Denver        |                              | Denver                  | Colorado                 | 80204           | US             |

| <b>Name</b>             | <b>Institution(s)</b>                       | <b>Primary<br/>Department</b> | <b>Institution City</b> | <b>Institution<br/>State</b> | <b>Zip<br/>Code</b> | <b>Country</b> |
|-------------------------|---------------------------------------------|-------------------------------|-------------------------|------------------------------|---------------------|----------------|
| Carey, Vincent          | Brigham &<br>Women's<br>Hospital            |                               | Boston                  | Massachusetts                | 02115               | US             |
| Carrier, Julie          | University of<br>Montreal                   |                               |                         |                              |                     | US             |
| Carson, April           |                                             | Medicine                      | Jackson                 | Mississippi                  | 39213               | US             |
| Carty, Cara             | Washington<br>State<br>University           |                               | Pullman                 | Washington                   | 99164               | US             |
| Casaburi,<br>Richard    | University of<br>California,<br>Los Angeles |                               | Los Angeles             | California                   | 90095               | US             |
| Casas Romero,<br>Juan P | Brigham &<br>Women's<br>Hospital            |                               |                         |                              |                     | US             |
| Casella, James          | Johns<br>Hopkins<br>University              |                               | Baltimore               | Maryland                     | 21218               | US             |

| <b>Name</b>     | <b>Institution(s)</b>                  | <b>Primary<br/>Department</b>         | <b>Institution City</b> | <b>Institution<br/>State</b> | <b>Zip<br/>Code</b> | <b>Country</b> |
|-----------------|----------------------------------------|---------------------------------------|-------------------------|------------------------------|---------------------|----------------|
| Castaldi, Peter | Brigham &<br>Women's<br>Hospital       | Medicine                              | Boston                  | Massachusetts                | 02115               | US             |
| Chaffin, Mark   | Broad<br>Institute                     |                                       | Cambridge               | Massachusetts                | 02142               | US             |
| Chang, Christy  | University of<br>Maryland              |                                       | Baltimore               | Maryland                     | 21201               | US             |
| Chang, Yi-Cheng | National<br>Taiwan<br>University       |                                       | Taipei                  |                              | 10617               | TW             |
| Chasman, Daniel | Brigham &<br>Women's<br>Hospital       | Division of<br>Preventive<br>Medicine | Boston                  | Massachusetts                | 02215               | US             |
| Chavan, Sameer  | University of<br>Colorado at<br>Denver |                                       | Denver                  | Colorado                     | 80204               | US             |
| Chen, Bo-Juen   | New York<br>Genome<br>Center           |                                       | New York                | New York                     | 10013               | US             |

| <b>Name</b>          | <b>Institution(s)</b>                                 | <b>Primary<br/>Department</b>          | <b>Institution City</b> | <b>Institution<br/>State</b> | <b>Zip<br/>Code</b> | <b>Country</b> |
|----------------------|-------------------------------------------------------|----------------------------------------|-------------------------|------------------------------|---------------------|----------------|
| Chen, Wei-Min        | University of<br>Virginia                             |                                        | Charlottesville         | Virginia                     | 22903               | US             |
| Chen, Yii-Der<br>Ida | Lundquist<br>Institute                                |                                        | Torrance                | California                   | 90502               | US             |
| Cho, Michael         | Brigham &<br>Women's<br>Hospital                      |                                        | Boston                  | Massachusetts                | 02115               | US             |
| Choi, Seung<br>Hoan  | Broad<br>Institute                                    |                                        | Cambridge               | Massachusetts                | 02142               | US             |
| Chuang, Lee-<br>Ming | National<br>Taiwan<br>University                      | National Taiwan<br>University Hospital | Taipei                  |                              | 10617               | TW             |
| Chung, Mina          | Cleveland<br>Clinic                                   | Cleveland Clinic                       | Cleveland               | Ohio                         | 44195               | US             |
| Chung, Ren-Hua       | National<br>Health<br>Research<br>Institute<br>Taiwan |                                        | Miaoli County           |                              | 350                 | TW             |

| <b>Name</b>          | <b>Institution(s)</b>                 | <b>Primary Department</b> | <b>Institution City</b> | <b>Institution State</b> | <b>Zip Code</b> | <b>Country</b> |
|----------------------|---------------------------------------|---------------------------|-------------------------|--------------------------|-----------------|----------------|
| Clish, Clary         | Broad Institute                       | Metabolomics Platform     | Cambridge               | Massachusetts            | 02142           | US             |
| Comhair, Suzy        | Cleveland Clinic                      | Immunity and Immunology   | Cleveland               | Ohio                     | 44195           | US             |
| Conomos, Matthew     | University of Washington              | Biostatistics             | Seattle                 | Washington               | 98195           | US             |
| Cornell, Elaine      | University of Vermont                 |                           | Burlington              | Vermont                  | 05405           | US             |
| Correa, Adolfo       | University of Mississippi             | Population Health Science | Jackson                 | Mississippi              | 39216           | US             |
| Crandall, Carolyn    | University of California, Los Angeles |                           | Los Angeles             | California               | 90095           | US             |
| Crapo, James         | National Jewish Health                |                           | Denver                  | Colorado                 | 80206           | US             |
| Cupples, L. Adrienne | Boston University                     | Biostatistics             | Boston                  | Massachusetts            | 02115           | US             |

| <b>Name</b>     | <b>Institution(s)</b>                                                | <b>Primary<br/>Department</b> | <b>Institution City</b> | <b>Institution<br/>State</b> | <b>Zip<br/>Code</b> | <b>Country</b> |
|-----------------|----------------------------------------------------------------------|-------------------------------|-------------------------|------------------------------|---------------------|----------------|
| Curran, Joanne  | University of<br>Texas Rio<br>Grande<br>Valley School<br>of Medicine |                               | Brownsville             | Texas                        | 78520               | US             |
| Curtis, Jeffrey | University of<br>Michigan                                            |                               | Ann Arbor               | Michigan                     | 48109               | US             |
| Custer, Brian   | Vitalant<br>Research<br>Institute                                    |                               | San Francisco           | California                   | 94118               | US             |
| Damcott, Coleen | University of<br>Maryland                                            |                               | Baltimore               | Maryland                     | 21201               | US             |
| Darbar, Dawood  | University of<br>Illinois at<br>Chicago                              |                               | Chicago                 | Illinois                     | 60607               | US             |
| David, Sean     | University of<br>Chicago                                             |                               | Chicago                 | Illinois                     | 60637               | US             |
| Davis, Colleen  | University of<br>Washington                                          |                               | Seattle                 | Washington                   | 98195               | US             |

| <b>Name</b>          | <b>Institution(s)</b>                 | <b>Primary Department</b>                                                                     | <b>Institution City</b> | <b>Institution State</b> | <b>Zip Code</b> | <b>Country</b> |
|----------------------|---------------------------------------|-----------------------------------------------------------------------------------------------|-------------------------|--------------------------|-----------------|----------------|
| Daya, Michelle       | University of Colorado at Denver      |                                                                                               | Denver                  | Colorado                 | 80204           | US             |
| de Andrade, Mariza   | Mayo Clinic                           | Health Quantitative Sciences Research                                                         | Rochester               | Minnesota                | 55905           | US             |
| de las Fuentes, Lisa | Washington University in St Louis     | Department of Medicine, Cardiovascular Division                                               | St. Louis               | Missouri                 | 63110           | US             |
| de Vries, Paul       | University of Texas Health at Houston | Human Genetics Center, Department of Epidemiology, Human Genetics, and Environmental Sciences | Houston                 | Texas                    | 77030           | US             |
| DeBaun, Michael      | Vanderbilt University                 |                                                                                               | Nashville               | Tennessee                | 37235           | US             |

| <b>Name</b>            | <b>Institution(s)</b>                                                       | <b>Primary<br/>Department</b> | <b>Institution City</b> | <b>Institution<br/>State</b> | <b>Zip<br/>Code</b> | <b>Country</b> |
|------------------------|-----------------------------------------------------------------------------|-------------------------------|-------------------------|------------------------------|---------------------|----------------|
| Deka, Ranjan           | University of<br>Cincinnati                                                 |                               | Cincinnati              | Ohio                         | 45220               | US             |
| DeMeo, Dawn            | Brigham &<br>Women's<br>Hospital                                            |                               | Boston                  | Massachusetts                | 02115               | US             |
| Devine, Scott          | University of<br>Maryland                                                   |                               | Baltimore               | Maryland                     | 21201               | US             |
| Dinh, Huyen            | Baylor<br>College of<br>Medicine<br>Human<br>Genome<br>Sequencing<br>Center |                               | Houston                 | Texas                        | 77030               | US             |
| Doddapaneni,<br>Harsha | Baylor<br>College of<br>Medicine<br>Human<br>Genome                         |                               | Houston                 | Texas                        | 77030               |                |



| <b>Name</b>             | <b>Institution(s)</b>                                                                                               | <b>Primary<br/>Department</b> | <b>Institution City</b> | <b>Institution<br/>State</b> | <b>Zip<br/>Code</b> | <b>Country</b> |
|-------------------------|---------------------------------------------------------------------------------------------------------------------|-------------------------------|-------------------------|------------------------------|---------------------|----------------|
| Duan, Qing              | Sequencing<br>Center<br>University of<br>North<br>Carolina                                                          |                               | Chapel Hill             | North Carolina               | 27599               | US             |
| Dugan-Perez,<br>Shannon | Baylor<br>College of<br>Medicine<br>Human<br>Genome<br>Sequencing<br>Center<br>University of<br>Texas Rio<br>Grande |                               | Houston                 | Texas                        | 77030               | US             |
| Duggirala, Ravi         | Valley School<br>of Medicine                                                                                        |                               | Edinburg                | Texas                        | 78539               | US             |
| Durda, Jon Peter        | University of<br>Vermont                                                                                            |                               | Burlington              | Vermont                      | 05405               | US             |

| <b>Name</b>          | <b>Institution(s)</b>                   | <b>Primary<br/>Department</b>               | <b>Institution City</b> | <b>Institution<br/>State</b> | <b>Zip<br/>Code</b> | <b>Country</b> |
|----------------------|-----------------------------------------|---------------------------------------------|-------------------------|------------------------------|---------------------|----------------|
| Dutcher, Susan<br>K. | Washington<br>University in<br>St Louis | Genetics                                    | St Louis                | Missouri                     | 63110               | US             |
| Eaton, Charles       | Brown<br>University                     |                                             | Providence              | Rhode Island                 | 02912               | US             |
| Ekunwe, Lynette      | University of<br>Mississippi            |                                             | Jackson                 | Mississippi                  | 38677               | US             |
| El Boueiz, Adel      | Harvard<br>University                   | Channing Division<br>of Network<br>Medicine | Cambridge               | Massachusetts                | 02138               | US             |
| Ellinor, Patrick     | Massachusetts<br>General<br>Hospital    |                                             | Boston                  | Massachusetts                | 02114               | US             |
| Emery, Leslie        | University of<br>Washington             |                                             | Seattle                 | Washington                   | 98195               | US             |
| Erzurum, Serpil      | Cleveland<br>Clinic                     |                                             | Cleveland               | Ohio                         | 44195               | US             |

| <b>Name</b>            | <b>Institution(s)</b>                                                       | <b>Primary<br/>Department</b>                  | <b>Institution City</b> | <b>Institution<br/>State</b> | <b>Zip<br/>Code</b> | <b>Country</b> |
|------------------------|-----------------------------------------------------------------------------|------------------------------------------------|-------------------------|------------------------------|---------------------|----------------|
| Farber, Charles        | University of<br>Virginia                                                   |                                                | Charlottesville         | Virginia                     | 22903               | US             |
| Farek, Jesse           | Baylor<br>College of<br>Medicine<br>Human<br>Genome<br>Sequencing<br>Center |                                                | Houston                 | Texas                        | 77030               | US             |
| Fingerlin, Tasha       | National<br>Jewish Health                                                   | Center for Genes,<br>Environment and<br>Health | Denver                  | Colorado                     | 80206               | US             |
| Flickinger,<br>Matthew | University of<br>Michigan                                                   |                                                | Ann Arbor               | Michigan                     | 48109               | US             |
| Fornage, Myriam        | University of<br>Texas Health<br>at Houston                                 |                                                | Houston                 | Texas                        | 77225               | US             |

| <b>Name</b>                | <b>Institution(s)</b>                                           | <b>Primary<br/>Department</b> | <b>Institution City</b> | <b>Institution<br/>State</b> | <b>Zip<br/>Code</b> | <b>Country</b> |
|----------------------------|-----------------------------------------------------------------|-------------------------------|-------------------------|------------------------------|---------------------|----------------|
| Franceschini,<br>Nora      | University of<br>North<br>Carolina                              | Epidemiology                  | Chapel Hill             | North Carolina               | 27599               | US             |
| Frazar, Chris              | University of<br>Washington                                     |                               | Seattle                 | Washington                   | 98195               | US             |
| Fu, Mao                    | University of<br>Maryland                                       |                               | Baltimore               | Maryland                     | 21201               | US             |
| Fullerton,<br>Stephanie M. | University of<br>Washington                                     |                               | Seattle                 | Washington                   | 98195               | US             |
| Fulton, Lucinda            | University in<br>St Louis                                       |                               | St Louis                | Missouri                     | 63130               | US             |
| Gabriel, Stacey            | Broad<br>Institute                                              |                               | Cambridge               | Massachusetts                | 02142               | US             |
| Gan, Weiniu                | National<br>Heart, Lung,<br>and Blood<br>Institute,<br>National |                               | Bethesda                | Maryland                     | 20892               | US             |

| <b>Name</b>     | <b>Institution(s)</b>                  | <b>Primary<br/>Department</b> | <b>Institution City</b> | <b>Institution<br/>State</b> | <b>Zip<br/>Code</b> | <b>Country</b> |
|-----------------|----------------------------------------|-------------------------------|-------------------------|------------------------------|---------------------|----------------|
|                 | Institutes of<br>Health                |                               |                         |                              |                     |                |
| Gao, Shanshan   | University of<br>Colorado at<br>Denver |                               | Denver                  | Colorado                     | 80204               | US             |
| Gao, Yan        | University of<br>Mississippi           |                               | Jackson                 | Mississippi                  | 38677               | US             |
|                 | Fred<br>Hutchinson                     |                               |                         |                              |                     |                |
| Gass, Margery   | Cancer<br>Research<br>Center           |                               | Seattle                 | Washington                   | 98109               | US             |
|                 | New York                               |                               |                         |                              |                     |                |
| Geiger, Heather | Genome<br>Center                       |                               | New York City           | New York                     | 10013               | US             |
|                 | Icahn School                           |                               |                         |                              |                     |                |
| Gelb, Bruce     | of Medicine at<br>Mount Sinai          |                               | New York                | New York                     | 10029               | US             |

| <b>Name</b>      | <b>Institution(s)</b>                         | <b>Primary<br/>Department</b> | <b>Institution City</b> | <b>Institution<br/>State</b> | <b>Zip<br/>Code</b> | <b>Country</b> |
|------------------|-----------------------------------------------|-------------------------------|-------------------------|------------------------------|---------------------|----------------|
| Geraci, Mark     | University of<br>Pittsburgh                   |                               | Pittsburgh              | Pennsylvania                 |                     | US             |
|                  | New York                                      |                               |                         |                              |                     |                |
| Germer, Soren    | Genome<br>Center                              |                               | New York                | New York                     | 10013               | US             |
|                  | Beth Israel<br>Deaconess<br>Medical<br>Center |                               |                         |                              |                     |                |
| Gerszten, Robert |                                               |                               | Boston                  | Massachusetts                | 02215               | US             |
|                  | Brigham &<br>Women's<br>Hospital              |                               |                         |                              |                     |                |
| Ghosh, Auyon     |                                               |                               | Boston                  | Massachusetts                | 02115               | US             |
|                  | Baylor<br>College of<br>Medicine              |                               |                         |                              |                     |                |
| Gibbs, Richard   | Human<br>Genome<br>Sequencing<br>Center       |                               | Houston                 | Texas                        | 77030               | US             |

| <b>Name</b>            | <b>Institution(s)</b>                                                | <b>Primary<br/>Department</b> | <b>Institution City</b> | <b>Institution<br/>State</b> | <b>Zip<br/>Code</b> | <b>Country</b> |
|------------------------|----------------------------------------------------------------------|-------------------------------|-------------------------|------------------------------|---------------------|----------------|
| Gignoux, Chris         | Stanford<br>University                                               |                               | Stanford                | California                   | 94305               | US             |
| Gladwin, Mark          | University of<br>Pittsburgh                                          |                               | Pittsburgh              | Pennsylvania                 | 15260               | US             |
| Glahn, David           | Boston<br>Children's<br>Hospital,<br>Harvard<br>Medical<br>School    | Department of<br>Psychiatry   | Boston                  | Massachusetts                | 02115               | US             |
| Gogarten,<br>Stephanie | University of<br>Washington                                          |                               | Seattle                 | Washington                   | 98195               | US             |
| Gong, Da-Wei           | University of<br>Maryland                                            |                               | Baltimore               | Maryland                     | 21201               | US             |
| Goring, Harald         | University of<br>Texas Rio<br>Grande<br>Valley School<br>of Medicine |                               | San Antonio             | Texas                        | 78229               | US             |

| <b>Name</b>      | <b>Institution(s)</b>                                      | <b>Primary<br/>Department</b> | <b>Institution City</b> | <b>Institution<br/>State</b> | <b>Zip<br/>Code</b> | <b>Country</b> |
|------------------|------------------------------------------------------------|-------------------------------|-------------------------|------------------------------|---------------------|----------------|
| Graw, Sharon     | University of<br>Colorado<br>Anschutz<br>Medical<br>Campus |                               | Aurora                  | Colorado                     | 80045               | US             |
| Gray, Kathryn J. | Mass General<br>Brigham                                    | Obstetrics and<br>Gynecology  | Boston                  | Massachusetts                | 02115               | US             |
| Grine, Daniel    | University of<br>Colorado at<br>Denver                     |                               | Denver                  | Colorado                     | 80204               | US             |
| Gross, Colin     | University of<br>Michigan                                  |                               | Ann Arbor               | Michigan                     | 48109               | US             |
| Gu, C. Charles   | Washington<br>University in<br>St Louis                    |                               | St Louis                | Missouri                     | 63130               | US             |
| Guan, Yue        | University of<br>Maryland                                  |                               | Baltimore               | Maryland                     | 21201               | US             |
| Guo, Xiuqing     | Lundquist<br>Institute                                     |                               | Torrance                | California                   | 90502               | US             |



| <b>Name</b>    | <b>Institution(s)</b>                                                       | <b>Primary<br/>Department</b> | <b>Institution City</b> | <b>Institution<br/>State</b> | <b>Zip<br/>Code</b> | <b>Country</b> |
|----------------|-----------------------------------------------------------------------------|-------------------------------|-------------------------|------------------------------|---------------------|----------------|
| Gupta, Namrata | Broad<br>Institute                                                          |                               | Cambridge               | Massachusetts                | 02142               | US             |
| Haas, David M. | Indiana<br>University                                                       | OB/GYN                        | Indianapolis            | Indiana                      | 46202               | US             |
| Haessler, Jeff | Fred<br>Hutchinson<br>Cancer<br>Research<br>Center                          |                               | Seattle                 | Washington                   | 98109               | US             |
| Hall, Michael  | University of<br>Mississippi                                                | Cardiology                    | Jackson                 | Mississippi                  | 39216               | US             |
| Han, Yi        | Baylor<br>College of<br>Medicine<br>Human<br>Genome<br>Sequencing<br>Center |                               | Houston                 | Texas                        | 77030               | US             |

| <b>Name</b>          | <b>Institution(s)</b>                         | <b>Primary Department</b>                        | <b>Institution City</b> | <b>Institution State</b> | <b>Zip Code</b> | <b>Country</b> |
|----------------------|-----------------------------------------------|--------------------------------------------------|-------------------------|--------------------------|-----------------|----------------|
| Hanly, Patrick       | University of<br>Calgary                      | Medicine                                         | Calgary                 |                          |                 | CA             |
| Harris, Daniel       | University of<br>Maryland                     | Genetics                                         | Philadelphia            | Pennsylvania             | 19104           | US             |
| Hawley, Nicola<br>L. | Yale<br>University                            | Department of<br>Chronic Disease<br>Epidemiology | New Haven               | Connecticut              | 06520           | US             |
| He, Jiang            | Tulane<br>University                          |                                                  | New Orleans             | Louisiana                | 70118           | US             |
| Heavner, Ben         | University of<br>Washington                   | Biostatistics                                    | Seattle                 | Washington               | 98195           | US             |
| Heckbert, Susan      | University of<br>Washington                   | Epidemiology                                     | Seattle                 | Washington               | 98195           | US             |
| Hernandez, Ryan      | University of<br>California,<br>San Francisco |                                                  | San Francisco           | California               | 94143           | US             |
| Herrington,<br>David | Wake Forest<br>Baptist Health                 |                                                  | Winston-Salem           | North Carolina           | 27157           | US             |

| <b>Name</b>     | <b>Institution(s)</b>                       | <b>Primary<br/>Department</b>               | <b>Institution City</b> | <b>Institution<br/>State</b> | <b>Zip<br/>Code</b> | <b>Country</b> |
|-----------------|---------------------------------------------|---------------------------------------------|-------------------------|------------------------------|---------------------|----------------|
| Hersh, Craig    | Brigham &<br>Women's<br>Hospital            | Channing Division<br>of Network<br>Medicine | Boston                  | Massachusetts                | 02115               | US             |
| Hidalgo, Bertha | University of<br>Alabama                    |                                             | Birmingham              | Alabama                      | 35487               | US             |
| Hixson, James   | University of<br>Texas Health<br>at Houston |                                             | Houston                 | Texas                        | 77225               | US             |
| Hobbs, Brian    | Brigham &<br>Women's<br>Hospital            |                                             | Boston                  | Massachusetts                | 02115               | US             |
| Hokanson, John  | University of<br>Colorado at<br>Denver      |                                             | Denver                  | Colorado                     | 80204               | US             |
| Hong, Elliott   | University of<br>Maryland                   |                                             | Baltimore               | Maryland                     | 21201               | US             |
| Hoth, Karin     | University of<br>Iowa                       |                                             | Iowa City               | Iowa                         | 52242               | US             |

| <b>Name</b>             | <b>Institution(s)</b>                                                          | <b>Primary<br/>Department</b>                       | <b>Institution City</b> | <b>Institution<br/>State</b> | <b>Zip<br/>Code</b> | <b>Country</b> |
|-------------------------|--------------------------------------------------------------------------------|-----------------------------------------------------|-------------------------|------------------------------|---------------------|----------------|
| Hsiung, Chao<br>(Agnes) | National<br>Health<br>Research<br>Institute<br>Taiwan                          | Institute of<br>Population Health<br>Sciences, NHRI | Miaoli County           |                              | 350                 | TW             |
| Hu, Jianhong            | Baylor<br>College of<br>Medicine<br>Human<br>Genome<br>Sequencing<br>Center    |                                                     | Houston                 | Texas                        | 77030               | US             |
| Hung, Yi-Jen            | Tri-Service<br>General<br>Hospital<br>National<br>Defense<br>Medical<br>Center |                                                     |                         |                              |                     | TW             |
| Huston, Haley           | Blood Works<br>Northwest                                                       |                                                     | Seattle                 | Washington                   | 98104               | US             |

| <b>Name</b>               | <b>Institution(s)</b>                                                | <b>Primary Department</b>                    | <b>Institution City</b> | <b>Institution State</b> | <b>Zip Code</b> | <b>Country</b> |
|---------------------------|----------------------------------------------------------------------|----------------------------------------------|-------------------------|--------------------------|-----------------|----------------|
| Hwu, Chii Min             | Taichung<br>Veterans<br>General<br>Hospital<br>Taiwan                |                                              | Taichung City           |                          | 407             | TW             |
| Irvin, Marguerite<br>Ryan | University of<br>Alabama<br>Oklahoma<br>State                        | Internal Medicine,<br>Division of            | Birmingham              | Alabama                  | 35487           | US             |
| Jackson, Rebecca          | University<br>Medical<br>Center                                      | Endocrinology,<br>Diabetes and<br>Metabolism | Columbus                | Ohio                     | 43210           | US             |
| Jain, Deepti              | University of<br>Washington<br>National<br>Heart, Lung,<br>and Blood | NHLBI                                        | Seattle                 | Washington               | 98195           | US             |
| Jaquish, Cashell          | Institute,<br>National                                               |                                              | Bethesda                | Maryland                 | 20892           | US             |

| <b>Name</b>     | <b>Institution(s)</b>                             | <b>Primary<br/>Department</b> | <b>Institution City</b> | <b>Institution<br/>State</b> | <b>Zip<br/>Code</b> | <b>Country</b> |
|-----------------|---------------------------------------------------|-------------------------------|-------------------------|------------------------------|---------------------|----------------|
|                 | Institutes of<br>Health                           |                               |                         |                              |                     |                |
| Johnsen, Jill   | Blood Works<br>Northwest                          | Research Institute            | Seattle                 | Washington                   | 98104               | US             |
|                 | National<br>Heart, Lung,<br>and Blood             |                               |                         |                              |                     |                |
| Johnson, Andrew | Institute,<br>National<br>Institutes of<br>Health |                               | Bethesda                | Maryland                     | 20892               | US             |
| Johnson, Craig  | University of<br>Washington                       |                               | Seattle                 | Washington                   | 98195               | US             |
| Johnston, Rich  | Emory<br>University                               |                               | Atlanta                 | Georgia                      | 30322               | US             |
|                 | Johns                                             |                               |                         |                              |                     |                |
| Jones, Kimberly | Hopkins<br>University                             |                               | Baltimore               | Maryland                     | 21218               | US             |

| <b>Name</b>      | <b>Institution(s)</b>                         | <b>Primary<br/>Department</b> | <b>Institution City</b> | <b>Institution<br/>State</b> | <b>Zip<br/>Code</b> | <b>Country</b> |
|------------------|-----------------------------------------------|-------------------------------|-------------------------|------------------------------|---------------------|----------------|
| Kang, Hyun Min   | University of<br>Michigan                     | Biostatistics                 | Ann Arbor               | Michigan                     | 48109               | US             |
| Kaplan, Robert   | Albert<br>Einstein<br>College of<br>Medicine  |                               | New York                | New York                     | 10461               | US             |
| Kardia, Sharon   | University of<br>Michigan                     |                               | Ann Arbor               | Michigan                     | 48109               | US             |
| Kelly, Shannon   | University of<br>California,<br>San Francisco |                               | San Francisco           | California                   | 94118               | US             |
| Kenny, Eimear    | Icahn School<br>of Medicine at<br>Mount Sinai |                               | New York                | New York                     | 10029               | US             |
| Kessler, Michael | University of<br>Maryland                     |                               | Baltimore               | Maryland                     | 21201               | US             |
| Khan, Alyna      | University of<br>Washington                   |                               | Seattle                 | Washington                   | 98195               | US             |

| <b>Name</b>            | <b>Institution(s)</b>                                                       | <b>Primary<br/>Department</b> | <b>Institution City</b> | <b>Institution<br/>State</b> | <b>Zip<br/>Code</b> | <b>Country</b> |
|------------------------|-----------------------------------------------------------------------------|-------------------------------|-------------------------|------------------------------|---------------------|----------------|
| Khan, Ziad             | Baylor<br>College of<br>Medicine<br>Human<br>Genome<br>Sequencing<br>Center |                               | Houston                 | Texas                        | 77030               | US             |
| Kim, Wonji             | Harvard<br>University                                                       |                               | Cambridge               | Massachusetts                | 02138               | US             |
| Kimoff, John           | McGill<br>University                                                        |                               | Montréal                |                              | QC H3A<br>0G4       | CA             |
| Kinney, Greg           | University of<br>Colorado at<br>Denver                                      | Epidemiology                  | Aurora                  | Colorado                     | 80045               | US             |
| Konkle, Barbara        | Blood Works<br>Northwest                                                    |                               | Seattle                 | Washington                   | 98104               | US             |
| Kooperberg,<br>Charles | Fred<br>Hutchinson<br>Cancer                                                |                               | Seattle                 | Washington                   | 98109               | US             |



| <b>Name</b>      | <b>Institution(s)</b>                  | <b>Primary<br/>Department</b> | <b>Institution City</b> | <b>Institution<br/>State</b> | <b>Zip<br/>Code</b> | <b>Country</b> |
|------------------|----------------------------------------|-------------------------------|-------------------------|------------------------------|---------------------|----------------|
|                  | Research<br>Center                     |                               |                         |                              |                     |                |
| Kramer, Holly    | Loyola<br>University                   | Public Health<br>Sciences     | Maywood                 | Illinois                     | 60153               | US             |
| Lange, Christoph | Harvard<br>School of<br>Public Health  | Biostats                      | Boston                  | Massachusetts                | 02115               | US             |
| Lange, Ethan     | University of<br>Colorado at<br>Denver |                               | Denver                  | Colorado                     | 80204               | US             |
| Lange, Leslie    | University of<br>Colorado at<br>Denver | Medicine                      | Aurora                  | Colorado                     | 80048               | US             |
| Laurie, Cathy    | University of<br>Washington            |                               | Seattle                 | Washington                   | 98195               | US             |
| Laurie, Cecelia  | University of<br>Washington            |                               | Seattle                 | Washington                   | 98195               | US             |

| <b>Name</b>          | <b>Institution(s)</b>                                                       | <b>Primary<br/>Department</b> | <b>Institution City</b> | <b>Institution<br/>State</b> | <b>Zip<br/>Code</b> | <b>Country</b> |
|----------------------|-----------------------------------------------------------------------------|-------------------------------|-------------------------|------------------------------|---------------------|----------------|
| LeBoff, Meryl        | Brigham &<br>Women's<br>Hospital                                            |                               | Boston                  | Massachusetts                | 02115               | US             |
| Lee, Jiwon           | Brigham &<br>Women's<br>Hospital                                            |                               | Boston                  | Massachusetts                | 02115               | US             |
| Lee, Sandra          | Baylor<br>College of<br>Medicine<br>Human<br>Genome<br>Sequencing<br>Center |                               | Houston                 | Texas                        | 77030               | US             |
| Lee, Wen-Jane        | Taichung<br>Veterans<br>General<br>Hospital<br>Taiwan                       |                               | Taichung City           |                              | 407                 | TW             |
| LeFaive,<br>Jonathon | University of<br>Michigan                                                   |                               | Ann Arbor               | Michigan                     | 48109               | US             |

| <b>Name</b>   | <b>Institution(s)</b>                                                                      | <b>Primary<br/>Department</b> | <b>Institution City</b> | <b>Institution<br/>State</b> | <b>Zip<br/>Code</b> | <b>Country</b> |
|---------------|--------------------------------------------------------------------------------------------|-------------------------------|-------------------------|------------------------------|---------------------|----------------|
| Levine, David | University of<br>Washington                                                                |                               | Seattle                 | Washington                   | 98195               | US             |
| Levy, Dan     | National<br>Heart, Lung,<br>and Blood<br>Institute,<br>National<br>Institutes of<br>Health |                               | Bethesda                | Maryland                     | 20892               | US             |
| Lewis, Joshua | University of<br>Maryland                                                                  |                               | Baltimore               | Maryland                     | 21201               | US             |
| Li, Xiaohui   | Lundquist<br>Institute                                                                     |                               | Torrance                | California                   | 90502               | US             |
| Li, Yun       | University of<br>North<br>Carolina                                                         |                               | Chapel Hill             | North Carolina               | 27599               | US             |
| Lin, Henry    | Lundquist<br>Institute                                                                     |                               | Torrance                | California                   | 90502               | US             |

| <b>Name</b>     | <b>Institution(s)</b>                   | <b>Primary Department</b>                                | <b>Institution City</b> | <b>Institution State</b> | <b>Zip Code</b> | <b>Country</b> |
|-----------------|-----------------------------------------|----------------------------------------------------------|-------------------------|--------------------------|-----------------|----------------|
| Lin, Honghuang  | Boston University                       |                                                          | Boston                  | Massachusetts            | 02215           | US             |
| Lin, Xihong     | Harvard School of Public Health         |                                                          | Boston                  | Massachusetts            | 02115           | US             |
| Liu, Simin      | Brown University                        | Epidemiology and Medicine                                | Providence              | Rhode Island             | 02912           | US             |
| Liu, Yongmei    | Duke University                         | Cardiology                                               | Durham                  | North Carolina           | 27708           | US             |
| Liu, Yu         | Stanford University                     | Cardiovascular Institute                                 | Stanford                | California               | 94305           | US             |
| Loos, Ruth J.F. | Icahn School of Medicine at Mount Sinai | The Charles Bronfman Institute for Personalized Medicine | New York                | New York                 | 10029           | US             |
| Lubitz, Steven  | Massachusetts General Hospital          |                                                          | Boston                  | Massachusetts            | 02114           | US             |

| <b>Name</b>          | <b>Institution(s)</b>                               | <b>Primary<br/>Department</b>                     | <b>Institution City</b> | <b>Institution<br/>State</b> | <b>Zip<br/>Code</b> | <b>Country</b> |
|----------------------|-----------------------------------------------------|---------------------------------------------------|-------------------------|------------------------------|---------------------|----------------|
| Lunetta, Kathryn     | Boston<br>University                                |                                                   | Boston                  | Massachusetts                | 02215               | US             |
|                      | National<br>Heart, Lung,<br>and Blood               |                                                   |                         |                              |                     |                |
| Luo, James           | Institute,<br>National<br>Institutes of<br>Health   |                                                   | Bethesda                | Maryland                     | 20892               | US             |
|                      |                                                     | Division of                                       |                         |                              |                     |                |
| Magalang,<br>Ulysses | Ohio State<br>University                            | Pulmonary,<br>Critical Care and<br>Sleep Medicine | Columbus                | Ohio                         | 43210               | US             |
|                      | University of                                       |                                                   |                         |                              |                     |                |
| Mahaney,<br>Michael  | Texas Rio<br>Grande<br>Valley School<br>of Medicine |                                                   | Brownsville             | Texas                        | 78520               | US             |

| <b>Name</b>      | <b>Institution(s)</b>                                                                 | <b>Primary<br/>Department</b> | <b>Institution City</b> | <b>Institution<br/>State</b> | <b>Zip<br/>Code</b> | <b>Country</b> |
|------------------|---------------------------------------------------------------------------------------|-------------------------------|-------------------------|------------------------------|---------------------|----------------|
| Make, Barry      | Johns<br>Hopkins<br>University                                                        |                               | Baltimore               | Maryland                     | 21218               | US             |
| Manichaikul, Ani | University of<br>Virginia                                                             |                               | Charlottesville         | Virginia                     | 22903               | US             |
| Manning, Alisa   | Broad<br>Institute,<br>Harvard<br>University,<br>Massachusetts<br>General<br>Hospital |                               |                         |                              |                     |                |
| Manson, JoAnn    | Brigham &<br>Women's<br>Hospital                                                      |                               | Boston                  | Massachusetts                | 02115               | US             |
| Martin, Lisa     | George<br>Washington<br>University                                                    | cardiology                    | Washington              | District of<br>Columbia      | 20037               | US             |

| <b>Name</b>             | <b>Institution(s)</b>                  | <b>Primary<br/>Department</b>             | <b>Institution City</b> | <b>Institution<br/>State</b> | <b>Zip<br/>Code</b> | <b>Country</b> |
|-------------------------|----------------------------------------|-------------------------------------------|-------------------------|------------------------------|---------------------|----------------|
| Marton, Melissa         | New York<br>Genome<br>Center           |                                           | New York City           | New York                     | 10013               | US             |
| Mathai, Susan           | University of<br>Colorado at<br>Denver |                                           | Denver                  | Colorado                     | 80204               | US             |
| Mathias, Rasika         | Johns<br>Hopkins<br>University         |                                           | Baltimore               | Maryland                     | 21218               | US             |
| May, Susanne            | University of<br>Washington            | Biostatistics                             | Seattle                 | Washington                   | 98195               | US             |
| McArdle, Patrick        | University of<br>Maryland              |                                           | Baltimore               | Maryland                     | 21201               | US             |
| McDonald,<br>Merry-Lynn | University of<br>Alabama               | University of<br>Alabama at<br>Birmingham | Birmingham              | Alabama                      | 35487               | US             |
| McFarland, Sean         | Harvard<br>University                  |                                           | Cambridge               | Massachusetts                | 02138               | US             |

| <b>Name</b>           | <b>Institution(s)</b>                               | <b>Primary<br/>Department</b> | <b>Institution City</b> | <b>Institution<br/>State</b> | <b>Zip<br/>Code</b> | <b>Country</b> |
|-----------------------|-----------------------------------------------------|-------------------------------|-------------------------|------------------------------|---------------------|----------------|
| McGarvey,<br>Stephen  | Brown<br>University                                 | Epidemiology                  | Providence              | Rhode Island                 | 02912               | US             |
| McGoldrick,<br>Daniel | University of<br>Washington                         | Genome Sciences               | Seattle                 | Washington                   | 98195               | US             |
| McHugh, Caitlin       | University of<br>Washington                         | Biostatistics                 | Seattle                 | Washington                   | 98195               | US             |
| McNeil, Becky         | RTI<br>International                                |                               |                         |                              |                     | US             |
| Mei, Hao              | University of<br>Mississippi                        |                               | Jackson                 | Mississippi                  | 38677               | US             |
| Meigs, James          | Massachusetts<br>General<br>Hospital                | Medicine                      | Boston                  | Massachusetts                | 02114               | US             |
| Menon, Vipin          | Baylor<br>College of<br>Medicine<br>Human<br>Genome |                               | Houston                 | Texas                        | 77030               | US             |



| <b>Name</b>          | <b>Institution(s)</b>                   | <b>Primary<br/>Department</b>                | <b>Institution City</b> | <b>Institution<br/>State</b> | <b>Zip<br/>Code</b> | <b>Country</b> |
|----------------------|-----------------------------------------|----------------------------------------------|-------------------------|------------------------------|---------------------|----------------|
|                      | Sequencing<br>Center                    |                                              |                         |                              |                     |                |
|                      | University of<br>Colorado               |                                              |                         |                              |                     |                |
| Mestroni, Luisa      | Anschutz<br>Medical<br>Campus           |                                              | Aurora                  | Colorado                     | 80045               | US             |
|                      | Baylor<br>College of<br>Medicine        |                                              |                         |                              |                     |                |
| Metcalf, Ginger      | Human<br>Genome<br>Sequencing<br>Center |                                              | Houston                 | Texas                        | 77030               | US             |
| Meyers, Deborah<br>A | University of<br>Arizona                |                                              | Tucson                  | Arizona                      | 85721               | US             |
| Mignot,<br>Emmanuel  | Stanford<br>University                  | Center For Sleep<br>Sciences and<br>Medicine | Palo Alto               | California                   | 94304               | US             |

| <b>Name</b>     | <b>Institution(s)</b>                                                 | <b>Primary<br/>Department</b> | <b>Institution City</b> | <b>Institution<br/>State</b> | <b>Zip<br/>Code</b> | <b>Country</b> |
|-----------------|-----------------------------------------------------------------------|-------------------------------|-------------------------|------------------------------|---------------------|----------------|
| Mikulla, Julie  | National<br>Heart, Lung,<br>and Blood<br>Institute,                   |                               | Bethesda                | Maryland                     | 20892               | US             |
| Min, Nancy      | National<br>Institutes of<br>Health<br>University of<br>Mississippi   |                               | Jackson                 | Mississippi                  | 38677               | US             |
| Minear, Mollie  | National<br>Institute of<br>Child Health<br>and Human<br>Development, |                               | Bethesda                | Maryland                     | 20892               | US             |
| Minster, Ryan L | National<br>Institutes of<br>Health<br>University of<br>Pittsburgh    |                               | Pittsburgh              | Pennsylvania                 | 15260               | US             |

| <b>Name</b>             | <b>Institution(s)</b>                                                       | <b>Primary<br/>Department</b> | <b>Institution City</b> | <b>Institution<br/>State</b> | <b>Zip<br/>Code</b> | <b>Country</b> |
|-------------------------|-----------------------------------------------------------------------------|-------------------------------|-------------------------|------------------------------|---------------------|----------------|
| Mitchell,<br>Braxton D. | University of<br>Maryland                                                   |                               | Baltimore               | Maryland                     | 21201               | US             |
| Moll, Matt              | Brigham &<br>Women's<br>Hospital                                            | Medicine                      | Boston                  | Massachusetts                | 02115               | US             |
| Momin, Zeineen          | Baylor<br>College of<br>Medicine<br>Human<br>Genome<br>Sequencing<br>Center |                               | Houston                 | Texas                        | 77030               | US             |
| Montasser, May<br>E.    | University of<br>Maryland<br>Oklahoma                                       |                               | Baltimore               | Maryland                     | 21201               | US             |
| Montgomery,<br>Courtney | Medical<br>Research<br>Foundation                                           | Genes and Human<br>Disease    | Oklahoma City           | Oklahoma                     | 73104               | US             |
| Muzny, Donna            | Baylor<br>College of                                                        |                               | Houston                 | Texas                        | 77030               | US             |

| <b>Name</b>             | <b>Institution(s)</b>                               | <b>Primary Department</b> | <b>Institution City</b> | <b>Institution State</b> | <b>Zip Code</b> | <b>Country</b> |
|-------------------------|-----------------------------------------------------|---------------------------|-------------------------|--------------------------|-----------------|----------------|
|                         | Medicine<br>Human<br>Genome<br>Sequencing<br>Center |                           |                         |                          |                 |                |
| Mychaleckyj,<br>Josyf C | University of<br>Virginia                           |                           | Charlottesville         | Virginia                 | 22903           | US             |
|                         | Icahn School<br>of Medicine at<br>Mount Sinai       |                           | New York                | New York                 | 10029           | US             |
| Nadkarni, Girish        | Johns<br>Hopkins<br>University                      |                           | Baltimore               | Maryland                 | 21218           | US             |
| Naik, Rakhi             |                                                     |                           |                         |                          |                 |                |
| Naseri, Take            | Ministry of<br>Health,<br>Government<br>of Samoa    |                           | Apia                    |                          |                 | WS             |
| Natarajan,<br>Pradeep   | Broad<br>Institute                                  |                           | Cambridge               | Massachusetts            | 02142           | US             |

| <b>Name</b>        | <b>Institution(s)</b>            | <b>Primary Department</b>     | <b>Institution City</b> | <b>Institution State</b> | <b>Zip Code</b> | <b>Country</b> |
|--------------------|----------------------------------|-------------------------------|-------------------------|--------------------------|-----------------|----------------|
| Nekhai, Sergei     | Howard University                |                               | Washington              | District of Columbia     | 20059           | US             |
| Nelson, Sarah C.   | University of Washington         | Biostatistics                 | Seattle                 | Washington               | 98195           | US             |
| Neltner, Bonnie    | University of Colorado at Denver |                               | Denver                  | Colorado                 | 80204           | US             |
| Nessner, Caitlin   | Baylor College of Medicine       |                               | Houston                 | Texas                    | 77030           | US             |
| Nickerson, Deborah | Human Genome Sequencing Center   |                               | Houston                 | Texas                    | 77030           | US             |
| Nkechinyere, Osuji | University of Washington         | Department of Genome Sciences | Seattle                 | Washington               | 98195           | US             |
|                    | Baylor College of Medicine       |                               | Houston                 | Texas                    | 77030           | US             |
|                    | Human                            |                               |                         |                          |                 |                |

| <b>Name</b>             | <b>Institution(s)</b>                                                       | <b>Primary<br/>Department</b> | <b>Institution City</b> | <b>Institution<br/>State</b> | <b>Zip<br/>Code</b> | <b>Country</b> |
|-------------------------|-----------------------------------------------------------------------------|-------------------------------|-------------------------|------------------------------|---------------------|----------------|
|                         | Genome<br>Sequencing<br>Center                                              |                               |                         |                              |                     |                |
| North, Kari             | University of<br>North<br>Carolina                                          |                               | Chapel Hill             | North Carolina               | 27599               | US             |
| O'Connell, Jeff         | University of<br>Maryland                                                   |                               | Balitmore               | Maryland                     | 21201               | US             |
| O'Connor, Tim           | University of<br>Maryland                                                   |                               | Baltimore               | Maryland                     | 21201               | US             |
| Ochs-Balcom,<br>Heather | University at<br>Buffalo                                                    |                               | Buffalo                 | New York                     | 14260               | US             |
| Okwuonu,<br>Geoffrey    | Baylor<br>College of<br>Medicine<br>Human<br>Genome<br>Sequencing<br>Center |                               | Houston                 | Texas                        | 77030               | US             |

| <b>Name</b>          | <b>Institution(s)</b>                                                    | <b>Primary Department</b>                         | <b>Institution City</b> | <b>Institution State</b> | <b>Zip Code</b> | <b>Country</b> |
|----------------------|--------------------------------------------------------------------------|---------------------------------------------------|-------------------------|--------------------------|-----------------|----------------|
| Pack, Allan          | University of Pennsylvania                                               | Division of Sleep Medicine/Department of Medicine | Philadelphia            | Pennsylvania             | 19104-3403      | US             |
| Paik, David T.       | Stanford University                                                      | Stanford Cardiovascular Institute                 | Stanford                | California               | 94305           | US             |
| Palmer, Nicholette   | Wake Forest Baptist Health                                               | Biochemistry                                      | Winston-Salem           | North Carolina           | 27157           | US             |
| Pankow, James        | University of Minnesota                                                  |                                                   | Minneapolis             | Minnesota                | 55455           | US             |
| Papanicolaou, George | National Heart, Lung, and Blood Institute, National Institutes of Health |                                                   | Bethesda                | Maryland                 | 20892           | US             |

| <b>Name</b>          | <b>Institution(s)</b>                                    | <b>Primary Department</b>               | <b>Institution City</b> | <b>Institution State</b> | <b>Zip Code</b> | <b>Country</b> |
|----------------------|----------------------------------------------------------|-----------------------------------------|-------------------------|--------------------------|-----------------|----------------|
| Parker, Cora         | RTI International                                        | Biostatistics and Epidemiology Division | Research Triangle Park  | North Carolina           | 27709-2194      | US             |
| Peloso, Gina         | Boston University                                        | Department of Biostatistics             | Boston                  | Massachusetts            | 02118           | US             |
| Peralta, Juan Manuel | University of Texas Rio Grande Valley School of Medicine |                                         | Edinburg                | Texas                    | 78539           | US             |
| Perez, Marco         | Stanford University                                      |                                         | Stanford                | California               | 94305           | US             |
| Perry, James         | University of Maryland                                   |                                         | Baltimore               | Maryland                 | 21201           | US             |
| Peters, Ulrike       | Fred Hutchinson Cancer Research Center                   | Fred Hutch and UW                       | Seattle                 | Washington               | 98109           | US             |



| <b>Name</b>                | <b>Institution(s)</b>                  | <b>Primary<br/>Department</b> | <b>Institution City</b> | <b>Institution<br/>State</b> | <b>Zip<br/>Code</b> | <b>Country</b> |
|----------------------------|----------------------------------------|-------------------------------|-------------------------|------------------------------|---------------------|----------------|
| Peysler, Patricia          | University of<br>Michigan              |                               | Ann Arbor               | Michigan                     | 48109               | US             |
| Phillips,<br>Lawrence S    | Emory<br>University                    |                               | Atlanta                 | Georgia                      | 30322               | US             |
| Pleiness, Jacob            | University of<br>Michigan              |                               | Ann Arbor               | Michigan                     | 48109               | US             |
| Pollin, Toni               | University of<br>Maryland              |                               | Baltimore               | Maryland                     | 21201               | US             |
| Post, Wendy                | Johns<br>Hopkins<br>University         | Cardiology/Medicine           | Baltimore               | Maryland                     | 21218               | US             |
| Powers Becker,<br>Julia    | University of<br>Colorado at<br>Denver | Medicine                      | Denver                  | Colorado                     | 80204               | US             |
| Preethi Boorgula,<br>Meher | University of<br>Colorado at<br>Denver |                               | Denver                  | Colorado                     | 80204               | US             |

| <b>Name</b>     | <b>Institution(s)</b>                                                                      | <b>Primary<br/>Department</b> | <b>Institution City</b> | <b>Institution<br/>State</b> | <b>Zip<br/>Code</b> | <b>Country</b> |
|-----------------|--------------------------------------------------------------------------------------------|-------------------------------|-------------------------|------------------------------|---------------------|----------------|
| Preuss, Michael | Icahn School<br>of Medicine at<br>Mount Sinai                                              |                               | New York                | New York                     | 10029               | US             |
| Psaty, Bruce    | University of<br>Washington                                                                |                               | Seattle                 | Washington                   | 98195               | US             |
| Qasba, Pankaj   | National<br>Heart, Lung,<br>and Blood<br>Institute,<br>National<br>Institutes of<br>Health |                               | Bethesda                | Maryland                     | 20892               | US             |
| Qiao, Dandi     | Brigham &<br>Women's<br>Hospital                                                           |                               | Boston                  | Massachusetts                | 02115               | US             |
| Qin, Zhaohui    | Emory<br>University                                                                        |                               | Atlanta                 | Georgia                      | 30322               | US             |

| <b>Name</b>               | <b>Institution(s)</b>                                                       | <b>Primary<br/>Department</b> | <b>Institution City</b> | <b>Institution<br/>State</b> | <b>Zip<br/>Code</b> | <b>Country</b> |
|---------------------------|-----------------------------------------------------------------------------|-------------------------------|-------------------------|------------------------------|---------------------|----------------|
| Rafaels, Nicholas         | University of<br>Colorado at<br>Denver                                      | CCPM                          | Denver                  | Colorado                     | 80045               | US             |
| Raffield, Laura           | University of<br>North<br>Carolina                                          | Genetics                      | Chapel Hill             | North Carolina               | 27599               | US             |
| Rajendran,<br>Mahitha     | Baylor<br>College of<br>Medicine<br>Human<br>Genome<br>Sequencing<br>Center |                               | Houston                 | Texas                        | 77030               | US             |
| Ramachandran,<br>Vasan S. | Boston<br>University                                                        |                               | Boston                  | Massachusetts                | 02215               | US             |
| Rao, D.C.                 | Washington<br>University in<br>St Louis                                     |                               | St Louis                | Missouri                     | 63130               | US             |

| <b>Name</b>                 | <b>Institution(s)</b>                               | <b>Primary<br/>Department</b> | <b>Institution City</b> | <b>Institution<br/>State</b> | <b>Zip<br/>Code</b> | <b>Country</b> |
|-----------------------------|-----------------------------------------------------|-------------------------------|-------------------------|------------------------------|---------------------|----------------|
| Rasmussen-<br>Torvik, Laura | Northwestern<br>University                          |                               | Chicago                 | Illinois                     | 60208               | US             |
| Ratan, Aakrosh              | University of<br>Virginia                           |                               | Charlottesville         | Virginia                     | 22903               | US             |
| Redline, Susan              | Brigham &<br>Women's<br>Hospital                    | Medicine                      | Boston                  | Massachusetts                | 02115               | US             |
| Reed, Robert                | University of<br>Maryland                           |                               | Baltimore               | Maryland                     | 21201               | US             |
| Reeves,<br>Catherine        | New York<br>Genome<br>Center                        | New York Genome<br>Center     | New York City           | New York                     | 10013               | US             |
| Regan, Elizabeth            | National<br>Jewish Health                           |                               | Denver                  | Colorado                     | 80206               | US             |
| Reiner, Alex                | Fred<br>Hutchinson<br>Cancer<br>Research<br>Center, |                               | Seattle                 | Washington                   | 98109               | US             |

| <b>Name</b>                        | <b>Institution(s)</b>                  | <b>Primary<br/>Department</b>                                                              | <b>Institution City</b> | <b>Institution<br/>State</b> | <b>Zip<br/>Code</b> | <b>Country</b> |
|------------------------------------|----------------------------------------|--------------------------------------------------------------------------------------------|-------------------------|------------------------------|---------------------|----------------|
|                                    | University of<br>Washington            |                                                                                            |                         |                              |                     |                |
| Reupena,<br>Muagututi'a<br>Sefuiva | Lutia I Puava<br>Ae Mapu I<br>Fagalele |                                                                                            | Apia                    |                              |                     | WS             |
| Rice, Ken                          | University of<br>Washington            |                                                                                            | Seattle                 | Washington                   | 98195               | US             |
| Rich, Stephen                      | University of<br>Virginia              |                                                                                            | Charlottesville         | Virginia                     | 22903               | US             |
| Robillard,<br>Rebecca              | University of<br>Ottawa                | Sleep Research<br>Unit, University of<br>Ottawa Institute for<br>Mental Health<br>Research | Ottawa                  |                              | ON K1Z<br>7K4       | CA             |
| Robine, Nicolas                    | New York<br>Genome<br>Center           |                                                                                            | New York City           | New York                     | 10013               | US             |
| Roden, Dan                         | Vanderbilt<br>University               | Medicine,<br>Pharmacology,                                                                 | Nashville               | Tennessee                    | 37235               | US             |

| <b>Name</b>       | <b>Institution(s)</b>                  | <b>Primary<br/>Department</b> | <b>Institution City</b> | <b>Institution<br/>State</b> | <b>Zip<br/>Code</b> | <b>Country</b> |
|-------------------|----------------------------------------|-------------------------------|-------------------------|------------------------------|---------------------|----------------|
|                   |                                        | Biomedicla<br>Informatics     |                         |                              |                     |                |
| Roselli, Carolina | Broad<br>Institute                     |                               | Cambridge               | Massachusetts                | 02142               | US             |
| Rotter, Jerome    | Lundquist<br>Institute                 | Pediatrics                    | Torrance                | California                   | 90502               | US             |
| Ruczinski, Ingo   | Johns<br>Hopkins<br>University         |                               | Baltimore               | Maryland                     | 21218               | US             |
| Runnels, Alexi    | New York<br>Genome<br>Center           |                               | New York City           | New York                     | 10013               | US             |
| Russell, Pamela   | University of<br>Colorado at<br>Denver |                               | Denver                  | Colorado                     | 80204               | US             |
| Ruuska, Sarah     | Blood Works<br>Northwest               |                               | Seattle                 | Washington                   | 98104               | US             |

| <b>Name</b>                | <b>Institution(s)</b>                                        | <b>Primary Department</b> | <b>Institution City</b> | <b>Institution State</b> | <b>Zip Code</b> | <b>Country</b> |
|----------------------------|--------------------------------------------------------------|---------------------------|-------------------------|--------------------------|-----------------|----------------|
| Ryan, Kathleen             | University of Maryland                                       |                           | Baltimore               | Maryland                 | 21201           | US             |
| Sabino, Ester<br>Cerqueira | Universidade de Sao Paulo                                    | Faculdade de Medicina     | Sao Paulo               |                          | 0131000<br>0    | BR             |
| Saleheen, Danish           | Columbia University                                          |                           | New York                | New York                 | 10027           | US             |
| Salimi, Shabnam            | University of Maryland                                       |                           | Baltimore               | Maryland                 | 21201           | US             |
| Salvi, Sejal               | Baylor College of Medicine<br>Human Genome Sequencing Center |                           | Houston                 | Texas                    | 77030           | US             |
| Salzberg, Steven           | Johns Hopkins University                                     |                           | Baltimore               | Maryland                 | 21218           | US             |

| <b>Name</b>        | <b>Institution(s)</b>             | <b>Primary Department</b>       | <b>Institution City</b> | <b>Institution State</b> | <b>Zip Code</b> | <b>Country</b> |
|--------------------|-----------------------------------|---------------------------------|-------------------------|--------------------------|-----------------|----------------|
| Sadow, Kevin       | Lundquist Institute               | TGPS                            | Torrance                | California               | 90502           | US             |
| Sankaran, Vijay G. | Harvard University                | Division of Hematology/Oncology | Boston                  | Massachusetts            | 02115           | US             |
|                    | Baylor College of Medicine        |                                 |                         |                          |                 |                |
| Santibanez, Jireh  | Human Genome Sequencing Center    |                                 | Houston                 | Texas                    | 77030           | US             |
| Schwander, Karen   | Washington University in St Louis |                                 | St Louis                | Missouri                 | 63130           | US             |
| Schwartz, David    | University of Colorado at Denver  |                                 | Denver                  | Colorado                 | 80204           | US             |



| <b>Name</b>              | <b>Institution(s)</b>        | <b>Primary<br/>Department</b> | <b>Institution City</b> | <b>Institution<br/>State</b> | <b>Zip<br/>Code</b> | <b>Country</b> |
|--------------------------|------------------------------|-------------------------------|-------------------------|------------------------------|---------------------|----------------|
| Sciurba, Frank           | University of<br>Pittsburgh  |                               | Pittsburgh              | Pennsylvania                 | 15260               | US             |
| Seidman,<br>Christine    | Harvard<br>Medical<br>School | Genetics                      | Boston                  | Massachusetts                | 02115               | US             |
| Seidman,<br>Jonathan     | Harvard<br>Medical<br>School |                               | Boston                  | Massachusetts                | 02115               | US             |
| Sériès, Frédéric         | Université<br>Laval          |                               | Quebec City             |                              | G1V 0A6             | CA             |
| Sheehan, Vivien          | Emory<br>University          | Pediatrics                    | Atlanta                 | Georgia                      | 30307               | US             |
| Sherman,<br>Stephanie L. | Emory<br>University          | Human Genetics                | Atlanta                 | Georgia                      | 30322               | US             |
| Shetty, Amol             | University of<br>Maryland    |                               | Baltimore               | Maryland                     | 21201               | US             |

| <b>Name</b>            | <b>Institution(s)</b>                        | <b>Primary Department</b> | <b>Institution City</b> | <b>Institution State</b> | <b>Zip Code</b> | <b>Country</b> |
|------------------------|----------------------------------------------|---------------------------|-------------------------|--------------------------|-----------------|----------------|
| Shetty, Aniket         | University of Colorado at Denver             |                           | Denver                  | Colorado                 | 80204           | US             |
| Sheu, Wayne Hui-Heng   | Taichung Veterans General Hospital<br>Taiwan |                           | Taichung City           |                          | 407             | TW             |
| Shoemaker, M. Benjamin | Vanderbilt University                        | Medicine/Cardiology       | Nashville               | Tennessee                | 37235           | US             |
| Silver, Brian          | UMass Memorial Medical Center                |                           | Worcester               | Massachusetts            | 01655           | US             |
| Silverman, Edwin       | Brigham & Women's Hospital                   |                           | Boston                  | Massachusetts            | 02115           | US             |
| Skomro, Robert         | University of Saskatchewan                   |                           | Saskatoon               |                          | SK S7N 5C9      | CA             |

| <b>Name</b>             | <b>Institution(s)</b>                        | <b>Primary Department</b>  | <b>Institution City</b> | <b>Institution State</b> | <b>Zip Code</b> | <b>Country</b> |
|-------------------------|----------------------------------------------|----------------------------|-------------------------|--------------------------|-----------------|----------------|
| Smith, Albert<br>Vernon | University of<br>Michigan                    |                            |                         |                          |                 |                |
| Smith, Jennifer         | University of<br>Michigan                    |                            | Ann Arbor               | Michigan                 | 48109           | US             |
| Smith, Josh             | University of<br>Washington                  |                            | Seattle                 | Washington               | 98195           | US             |
| Smith, Nicholas         | University of<br>Washington                  | Epidemiology               | Seattle                 | Washington               | 98195           | US             |
| Smith, Tanja            | New York<br>Genome<br>Center                 |                            | New York                | New York                 | 10013           | US             |
| Smoller, Sylvia         | Albert<br>Einstein<br>College of<br>Medicine |                            | New York                | New York                 | 10461           | US             |
| Snively, Beverly        | Wake Forest<br>Baptist Health                | Biostatistical<br>Sciences | Winston-Salem           | North Carolina           | 27157           | US             |

| <b>Name</b>            | <b>Institution(s)</b>                  | <b>Primary<br/>Department</b>         | <b>Institution City</b> | <b>Institution<br/>State</b> | <b>Zip<br/>Code</b> | <b>Country</b> |
|------------------------|----------------------------------------|---------------------------------------|-------------------------|------------------------------|---------------------|----------------|
| Snyder, Michael        | Stanford<br>University                 |                                       | Stanford                | California                   | 94305               | US             |
| Sofer, Tamar           | Brigham &<br>Women's<br>Hospital       |                                       | Boston                  | Massachusetts                | 02115               | US             |
| Sotoodehnia,<br>Nona   | University of<br>Washington            |                                       | Seattle                 | Washington                   | 98195               | US             |
| Stilp, Adrienne<br>M.  | University of<br>Washington            |                                       | Seattle                 | Washington                   | 98195               | US             |
| Storm, Garrett         | University of<br>Colorado at<br>Denver | Genomic<br>Cardiology                 | Aurora                  | Colorado                     | 80045               | US             |
| Streeten,<br>Elizabeth | University of<br>Maryland              |                                       | Baltimore               | Maryland                     | 21201               | US             |
| Su, Jessica Lasky      | Brigham &<br>Women's<br>Hospital       | Channing<br>Department of<br>Medicine | Boston                  | Massachusetts                | 02115               | US             |

| <b>Name</b>     | <b>Institution(s)</b>                   | <b>Primary<br/>Department</b>                  | <b>Institution City</b> | <b>Institution<br/>State</b> | <b>Zip<br/>Code</b> | <b>Country</b> |
|-----------------|-----------------------------------------|------------------------------------------------|-------------------------|------------------------------|---------------------|----------------|
| Sung, Yun Ju    | Washington<br>University in<br>St Louis |                                                | St Louis                | Missouri                     | 63130               | US             |
| Sylvia, Jody    | Brigham &<br>Women's<br>Hospital        |                                                | Boston                  | Massachusetts                | 02115               | US             |
| Szpiro, Adam    | University of<br>Washington             |                                                | Seattle                 | Washington                   | 98195               | US             |
| Taliun, Daniel  | University of<br>Michigan               |                                                | Ann Arbor               | Michigan                     | 48109               | US             |
| Tang, Hua       | Stanford<br>University                  | Genetics                                       | Stanford                | California                   | 94305               | US             |
| Taub, Margaret  | Johns<br>Hopkins<br>University          |                                                | Baltimore               | Maryland                     | 21218               | US             |
| Taylor, Kent D. | Lundquist<br>Institute                  | Institute for<br>Translational<br>Genomics and | Torrance                | California                   | 90502               | US             |

| <b>Name</b>             | <b>Institution(s)</b>         | <b>Primary<br/>Department</b>                   | <b>Institution City</b> | <b>Institution<br/>State</b> | <b>Zip<br/>Code</b> | <b>Country</b> |
|-------------------------|-------------------------------|-------------------------------------------------|-------------------------|------------------------------|---------------------|----------------|
|                         |                               | Populations<br>Sciences                         |                         |                              |                     |                |
|                         | University of<br>Colorado     |                                                 |                         |                              |                     |                |
| Taylor, Matthew         | Anschutz<br>Medical<br>Campus |                                                 | Aurora                  | Colorado                     | 80045               | US             |
| Taylor, Simeon          | University of<br>Maryland     |                                                 | Baltimore               | Maryland                     | 21201               | US             |
| Telen, Marilyn          | Duke<br>University            |                                                 | Durham                  | North Carolina               | 27708               | US             |
| Thornton,<br>Timothy A. | University of<br>Washington   |                                                 | Seattle                 | Washington                   | 98195               | US             |
|                         |                               | University of                                   |                         |                              |                     |                |
| Threlkeld,<br>Machiko   | University of<br>Washington   | Washington,<br>Department of<br>Genome Sciences | Seattle                 | Washington                   | 98195               | US             |
| Tinker, Lesley          | Fred<br>Hutchinson            |                                                 | Seattle                 | Washington                   | 98109               | US             |

| <b>Name</b>          | <b>Institution(s)</b>         | <b>Primary<br/>Department</b>         | <b>Institution City</b> | <b>Institution<br/>State</b> | <b>Zip<br/>Code</b> | <b>Country</b> |
|----------------------|-------------------------------|---------------------------------------|-------------------------|------------------------------|---------------------|----------------|
|                      | Cancer<br>Research<br>Center  |                                       |                         |                              |                     |                |
| Tirschwell,<br>David | University of<br>Washington   |                                       | Seattle                 | Washington                   | 98195               | US             |
| Tishkoff, Sarah      | University of<br>Pennsylvania | Genetics                              | Philadelphia            | Pennsylvania                 | 19104               | US             |
| Tiwari, Hemant       | University of<br>Alabama      | Biostatistics                         | Birmingham              | Alabama                      | 35487               | US             |
| Tong, Catherine      | University of<br>Washington   | Department of<br>Biostatistics        | Seattle                 | Washington                   | 98195               | US             |
| Tracy, Russell       | University of<br>Vermont      | Pathology &<br>Laboratory<br>Medicine | Burlington              | Vermont                      | 05405               | US             |
| Tsai, Michael        | University of<br>Minnesota    |                                       | Minneapolis             | Minnesota                    | 55455               | US             |

| <b>Name</b>            | <b>Institution(s)</b>                   | <b>Primary Department</b>                     | <b>Institution City</b>                 | <b>Institution State</b> | <b>Zip Code</b> | <b>Country</b> |
|------------------------|-----------------------------------------|-----------------------------------------------|-----------------------------------------|--------------------------|-----------------|----------------|
| Vaidya,<br>Dhananjay   | Johns<br>Hopkins<br>University          |                                               | Baltimore                               | Maryland                 | 21218           | US             |
| Van Den Berg,<br>David | University of<br>Southern<br>California | USC Methylation<br>Characterization<br>Center | University of<br>Southern<br>California | California               | 90033           | US             |
| VandeHaar,<br>Peter    | University of<br>Michigan               |                                               | Ann Arbor                               | Michigan                 | 48109           | US             |
| Vrieze, Scott          | University of<br>Minnesota              |                                               | Minneapolis                             | Minnesota                | 55455           | US             |
| Walker, Tarik          | University of<br>Colorado at<br>Denver  |                                               | Denver                                  | Colorado                 | 80204           | US             |
| Wallace, Robert        | University of<br>Iowa                   |                                               | Iowa City                               | Iowa                     | 52242           | US             |
| Walts, Avram           | University of<br>Colorado at<br>Denver  |                                               | Denver                                  | Colorado                 | 80204           | US             |



| <b>Name</b>        | <b>Institution(s)</b>                                                       | <b>Primary<br/>Department</b> | <b>Institution City</b> | <b>Institution<br/>State</b> | <b>Zip<br/>Code</b> | <b>Country</b> |
|--------------------|-----------------------------------------------------------------------------|-------------------------------|-------------------------|------------------------------|---------------------|----------------|
| Wang, Fei Fei      | University of<br>Washington                                                 |                               | Seattle                 | Washington                   | 98195               | US             |
| Wang, Heming       | Brigham &<br>Women's<br>Hospital,<br>Mass General<br>Brigham                |                               | Boston                  | Massachusetts                | 02115               | US             |
| Wang,<br>Jiongming | University of<br>Michigan                                                   |                               |                         |                              |                     | US             |
| Watson, Karol      | University of<br>California,<br>Los Angeles                                 |                               | Los Angeles             | California                   | 90095               | US             |
| Watt, Jennifer     | Baylor<br>College of<br>Medicine<br>Human<br>Genome<br>Sequencing<br>Center |                               | Houston                 | Texas                        | 77030               | US             |

| <b>Name</b>       | <b>Institution(s)</b>                       | <b>Primary Department</b>                                                 | <b>Institution City</b> | <b>Institution State</b> | <b>Zip Code</b> | <b>Country</b> |
|-------------------|---------------------------------------------|---------------------------------------------------------------------------|-------------------------|--------------------------|-----------------|----------------|
| Weeks, Daniel E.  | University of Pittsburgh                    |                                                                           | Pittsburgh              | Pennsylvania             | 15260           | US             |
| Weinstock, Joshua | University of Michigan                      | Biostatistics                                                             | Ann Arbor               | Michigan                 | 48109           | US             |
| Weir, Bruce       | University of Washington                    |                                                                           | Seattle                 | Washington               | 98195           | US             |
| Weiss, Scott T    | Brigham & Women's Hospital<br>Massachusetts | Channing Division<br>of Network<br>Medicine,<br>Department of<br>Medicine | Boston                  | Massachusetts            | 02115           | US             |
| Weng, Lu-Chen     | General Hospital                            |                                                                           | Boston                  | Massachusetts            | 02114           | US             |
| Wessel, Jennifer  | Indiana University                          | Epidemiology                                                              | Indianapolis            | Indiana                  | 46202           | US             |
| Willer, Cristen   | University of Michigan                      | Internal Medicine                                                         | Ann Arbor               | Michigan                 | 48109           | US             |

| <b>Name</b>           | <b>Institution(s)</b>                         | <b>Primary<br/>Department</b> | <b>Institution City</b> | <b>Institution<br/>State</b> | <b>Zip<br/>Code</b> | <b>Country</b> |
|-----------------------|-----------------------------------------------|-------------------------------|-------------------------|------------------------------|---------------------|----------------|
| Williams,<br>Kayleen  | University of<br>Washington                   | Biostatistics                 | Seattle                 | Washington                   | 98195               | US             |
| Williams, L.<br>Keoki | Henry Ford<br>Health<br>System                |                               | Detroit                 | Michigan                     | 48202               | US             |
| Wilson, Carla         | Brigham &<br>Women's<br>Hospital              |                               | Boston                  | Massachusetts                | 02115               | US             |
| Wilson, James         | Beth Israel<br>Deaconess<br>Medical<br>Center | Cardiology                    | Cambridge               | Massachusetts                | 02139               | US             |
| Winterkorn, Lara      | New York<br>Genome<br>Center                  |                               | New York City           | New York                     | 10013               | US             |
| Wong, Quenna          | University of<br>Washington                   |                               | Seattle                 | Washington                   | 98195               | US             |

| <b>Name</b>                | <b>Institution(s)</b>                  | <b>Primary<br/>Department</b>           | <b>Institution City</b> | <b>Institution<br/>State</b> | <b>Zip<br/>Code</b> | <b>Country</b> |
|----------------------------|----------------------------------------|-----------------------------------------|-------------------------|------------------------------|---------------------|----------------|
| Wu, Joseph                 | Stanford<br>University                 | Stanford<br>Cardiovascular<br>Institute | Stanford                | California                   | 94305               | US             |
| Xu, Huichun                | University of<br>Maryland              |                                         | Baltimore               | Maryland                     | 21201               | US             |
| Yanek, Lisa                | Johns<br>Hopkins<br>University         |                                         | Baltimore               | Maryland                     | 21218               | US             |
| Yang, Ivana                | University of<br>Colorado at<br>Denver |                                         | Denver                  | Colorado                     | 80204               | US             |
| Yu, Ketian                 | University of<br>Michigan              |                                         | Ann Arbor               | Michigan                     | 48109               | US             |
| Zekavat,<br>Seyedeh Maryam | Broad<br>Institute                     |                                         | Cambridge               | Massachusetts                | 02142               | US             |
| Zhang, Yingze              | University of<br>Pittsburgh            | Medicine                                | Pittsburgh              | Pennsylvania                 | 15260               | US             |

| <b>Name</b>            | <b>Institution(s)</b>                 | <b>Primary<br/>Department</b>                                      | <b>Institution City</b> | <b>Institution<br/>State</b> | <b>Zip<br/>Code</b> | <b>Country</b> |
|------------------------|---------------------------------------|--------------------------------------------------------------------|-------------------------|------------------------------|---------------------|----------------|
| Zhao, Snow<br>Xueyan   | National<br>Jewish Health             |                                                                    | Denver                  | Colorado                     | 80206               | US             |
| Zhao, Wei              | University of<br>Michigan             | Department of<br>Epidemiology                                      | Ann Arbor               | Michigan                     | 48109               | US             |
| Zhu, Xiaofeng          | Case Western<br>Reserve<br>University | Department of<br>Population and<br>Quantitative Health<br>Sciences | Cleveland               | Ohio                         | 44106               | US             |
| Zody, Michael          | New York<br>Genome<br>Center          |                                                                    | New York                | New York                     | 10013               | US             |
| Zoellner,<br>Sebastian | University of<br>Michigan             |                                                                    | Ann Arbor               | Michigan                     | 48109               | US             |
